# Supplementary material for: Deep Learning for the Detection of Multiple Fundus Diseases Using Ultra-widefield Images
Source: PubMed Central journal article supplement — Ophthalmol Ther. 2022 Dec 24;12(2):895–907. doi: 10.1007/s40123-022-00627-3 (PMC10011259; doi:10.1007/s40123-022-00627-3), 2022-12-24
Supplement: 40123_2022_627_MOESM1_ESM.pdf [file 40123_2022_627_MOESM1_ESM.pdf]

# Deep learning for the detection of multiple fundus diseases using ultra-widefield images

Gongpeng Sun<sup>1\*</sup>, Xiaoling Wang<sup>1\*</sup>, Lizhang Xu<sup>2</sup>, Chang Li<sup>3</sup>, Wenyu Wang<sup>1</sup>, Zuohuizi Yi<sup>1</sup>, Huijuan Luo<sup>4</sup>, Yu Su<sup>1</sup>, Jian Zheng<sup>5</sup>, Zhiqing Li<sup>3</sup>, Zhen Chen<sup>1</sup>, Hongmei Zheng<sup>1</sup>,

Changzheng Chen<sup>1</sup>

<sup>1</sup> Eye Center, Renmin Hospital of Wuhan University, Wuhan 430060, China;

<sup>2</sup> Wuhan Aiyanbang Technology Co., Ltd, Wuhan 430073, China;

<sup>3</sup> Tianjin Key Laboratory of Retinal Functions and Diseases, Tianjin International

Joint Research and Development Centre of Ophthalmology and Vision Science, Eye Institute and School of Optometry, Tianjin Medical University Eye Hospital, Tianjin 300384, China;

<sup>4</sup> The People's Hospital of Yidu, Yidu 443300, China

<sup>5</sup> School of Electronic Information and Electric Engineering, Shanghai Jiao Tong University, Shanghai 200240, China

\* These authors contributed equally.

Correspondence: Zhen Chen, e-mail: [hchenzhen@163.com](mailto:hchenzhen@163.com); Hongmei Zheng, email: [312930646@qq.com](mailto:312930646@qq.com); Changzheng Chen, e-mail: [whuchenchzh@163.com](mailto:whuchenchzh@163.com); Eye Center,

Renmin Hospital of Wuhan University, No. 9 ZhangZhiDong Street, Wuchang District, Wuhan 430060, Hubei, China

Table S1. Standard diagnostic criteria for nine labels

| Labels                           | Standard diagnostic criteria                                                                                                                                                                                                                                                                                                 |
|----------------------------------|------------------------------------------------------------------------------------------------------------------------------------------------------------------------------------------------------------------------------------------------------------------------------------------------------------------------------|
| Normal fundus                    | Visible central macular, normal cup-to-disc ratio size, no obvious abnormal optic disc or retinal changes                                                                                                                                                                                                                    |
| Referable diabetic retinopathy   | One or more fundus conditions such as microaneurysms, retinal hemorrhages, exudates, or cotton wool spots on UWFI, in addition to new vessels on the disc or elsewhere, vitreous hemorrhages, tractional retinal detachment, fibrovascular membrane, or diagnosed based on ultra-widefield fluorescein fundus angiography    |
| Retinal vein occlusion           | Patchy and flame-like retinal hemorrhages, tortuous and dilated retinal veins, with or without macular edema or disc edema, accompanied by hard exudate, cotton wool spots and et al                                                                                                                                         |
| Pathologic myopia                | Myopic exceeding -6 diopters and of category 2 to category 4 of the META-PM classification system <sup>1</sup>                                                                                                                                                                                                               |
| Retinal detachment               | Grey-green elevation of the retina, with or without visible peripheral retinal degenerations or retinal tears                                                                                                                                                                                                                |
| Age-related macular degeneration | Medium or larger drusen, may be accompanied by hyperpigmentation or hypopigmentation in the macula, with or without geographic atrophy and red intraretinal hemorrhage                                                                                                                                                       |
| Retinitis pigmentosa             | Extensive bone spicule-like pigment epithelial hyperplasia surrounding the posterior pole and extending into the middle and far periphery of the fundus, with a waxy pale disc                                                                                                                                               |
| Vitreous opacity                 | Vitreous floaters causing small black shadows in front of the retina, with or without visible weiss rings                                                                                                                                                                                                                    |
| Optic neuropathy                 | Optic nerve atrophy: yellowish or pale color of the optic disc; possible glaucomatous optic neuropathy: cup-to-disc ratio >0.6 with or without corresponding nerve fiber layer defects; papilledema or optic disc oedema: bulging edema of the optic disc, blurring of the optic disc border and dilated retinal capillaries |

1. Ohno-Matsui K, Kawasaki R, Jonas JB, et al. International photographic classification and grading system for myopic maculopathy. *Am J Ophthalmol* 2015;159:877-883.e877.

Table S2. Performance of EfficientNet-B7 model, DenseNet model and ResNet-101 model on internal test set

| Label                            | EfficientNet-B7  |                  |                  |                  |                  | DenseNet         |                  |                  |                  |                  | ResNet-101       |                  |                  |                  |                  |
|----------------------------------|------------------|------------------|------------------|------------------|------------------|------------------|------------------|------------------|------------------|------------------|------------------|------------------|------------------|------------------|------------------|
|                                  | Sensitivity      | Specificity      | Accurac<br>y     | AUC              | MCC              | Sensitivit<br>y  | Specificit<br>y  | Accuracy         | AUC              | MCC              | Sensitivit<br>y  | Specificit<br>y  | Accuracy         | AUC              | MCC              |
| Normal fundus                    | 0.8916           | 0.9783           | 0.9661           | 0.9811           | 0.8332           | 0.8072           | 0.9803           | 0.9559           | 0.9574           | 0.7904           | 0.9750           | 0.9049           | 0.9251           | 0.9823           | 0.8289           |
|                                  | (0.8857, 0.9010) | (0.9780, 0.9801) | (0.9650, 0.9688) | (0.9207, 0.9892) | (0.8493, 0.8633) | (0.8000, 0.8158) | (0.9796, 0.9824) | (0.9537, 0.9575) | (0.8706, 0.9669) | (0.8276, 0.8374) | (0.9724, 0.9779) | (0.9022, 0.9081) | (0.9237, 0.9263) | (0.9257, 0.9942) | (0.8771, 0.8859) |
| Referable diabetic retinopathy   | 0.9231           | 0.9980           | 0.9881           | 0.9977           | 0.8479           | 0.8333           | 0.9941           | 0.9729           | 0.9766           | 0.9083           | 0.9106           | 0.9976           | 0.9867           | 0.9933           | 0.8341           |
|                                  | (0.9208, 0.9307) | (0.9985, 0.9986) | (0.9875, 0.9900) | (0.9307, 0.9994) | (0.8807, 0.8868) | (0.8269, 0.8417) | (0.9941, 0.9944) | (0.9725, 0.9750) | (0.8720, 0.9855) | (0.9254, 0.9310) | (0.9082, 0.9175) | (0.9972, 0.9986) | (0.9850, 0.9875) | (0.9287, 0.9995) | (0.8387, 0.8600) |
| Retinal vein occlusion           | 0.9583           | 0.9942           | 0.9898           | 0.9836           | 0.9470           | 0.9444           | 0.9865           | 0.9814           | 0.9861           | 0.9546           | 0.8529           | 0.9890           | 0.9795           | 0.9886           | 0.9547           |
|                                  | (0.9588, 0.9674) | (0.9943, 0.9956) | (0.9875, 0.9900) | (0.9528, 0.9997) | (0.9496, 0.9593) | (0.9439, 0.9540) | (0.9856, 0.9872) | (0.9812, 0.9825) | (0.9384, 0.9718) | (0.9630, 0.9718) | (0.8431, 0.8679) | (0.9879, 0.9906) | (0.9788, 0.9812) | (0.8784, 0.9935) | (0.9474, 0.9600) |
| Pathologic myopia                | 0.9643           | 0.9963           | 0.9932           | 0.9968           | 0.9366           | 0.9464           | 0.9906           | 0.9864           | 0.9974           | 0.7534           | 0.9143           | 0.9954           | 0.9867           | 0.9941           | 0.7964           |
|                                  | (0.9583, 0.9674) | (0.9959, 0.9972) | (0.9938, 0.9950) | (0.9556, 1.0000) | (0.9492, 0.9569) | (0.9412, 0.9545) | (0.9901, 0.9905) | (0.9862, 0.9875) | (0.9385, 0.9986) | (0.7812, 0.7956) | (0.9062, 0.9211) | (0.9957, 0.9958) | (0.9862, 0.9875) | (0.9278, 0.9918) | (0.8046, 0.8235) |
| Retinal detachment               | 0.9636           | 0.9944           | 0.9915           | 0.9982           | 0.9571           | 0.9455           | 0.9925           | 0.9881           | 0.9917           | 0.9256           | 0.9701           | 0.9917           | 0.9887           | 0.9970           | 0.9486           |
|                                  | (0.9615, 0.9718) | (0.9932, 0.9945) | (0.9900, 0.9925) | (0.9307, 0.9994) | (0.9605, 0.9673) | (0.9444, 0.9565) | (0.9918, 0.9933) | (0.9862, 0.9888) | (0.9385, 0.9995) | (0.9333, 0.9427) | (0.9623, 0.9722) | (0.9914, 0.9930) | (0.9888, 0.9900) | (0.9661, 0.9987) | (0.9583, 0.9665) |
| Age-related macular degeneration | 0.8667           | 0.9755           | 0.9644           | 0.9708           | 0.8035           | 0.8333           | 0.9679           | 0.9542           | 0.9617           | 0.8499           | 0.7805           | 0.9936           | 0.9846           | 0.9773           | 0.7919           |
|                                  | (0.8636, 0.8810) | (0.9736, 0.9763) | (0.9637, 0.9675) | (0.8772, 0.9849) | (0.8250, 0.8380) | (0.8205, 0.8400) | (0.9672, 0.9701) | (0.9513, 0.9563) | (0.9125, 0.9688) | (0.8673, 0.8774) | (0.7647, 0.7931) | (0.9934, 0.9935) | (0.9825, 0.9850) | (0.8728, 0.9812) | (0.8116, 0.8322) |
| Retinitis pigmentosa             | 1.0000           | 1.0000           | 1.0000           | 1.0000           | 1.0000           | 0.9322           | 1.0000           | 0.9932           | 0.9821           | 0.9178           | 1.0000           | 0.9968           | 0.9887           | 0.9969           | 0.9202           |
|                                  | (1.0000, 1.0000) | (1.0000, 1.0000) | (1.0000, 1.0000) | (1.0000, 1.0000) | (1.0000, 1.0000) | (0.9296, 0.9437) | (1.0000, 1.0000) | (0.9925, 0.9938) | (0.9338, 0.9985) | (0.9265, 0.9379) | (1.0000, 1.0000) | (0.9961, 0.9974) | (0.9888, 0.9900) | (0.9966, 1.0000) | (0.9302, 0.9412) |
| Vitreous opacity                 | 0.8727           | 0.9832           | 0.9729           | 0.9758           | 0.8627           | 0.8727           | 0.9869           | 0.9763           | 0.9717           | 0.8651           | 0.7527           | 0.9921           | 0.9692           | 0.9625           | 0.7093           |
|                                  | (0.8696, 0.8861) | (0.9822, 0.9848) | (0.9725, 0.9738) | (0.8832, 0.9827) | (0.8877, 0.8976) | (0.8667, 0.8889) | (0.9864, 0.9888) | (0.9750, 0.9775) | (0.9234, 0.984)  | (0.8854, 0.8969) | (0.7429, 0.7639) | (0.9917, 0.9931) | (0.9688, 0.9712) | (0.8601, 0.9767) | (0.7324, 0.7532) |
| Optic neuropathy                 | 0.8611           | 0.9903           | 0.9746           | 0.9879           | 0.9472           | 0.9306           | 0.9768           | 0.9712           | 0.9809           | 0.8563           | 0.6224           | 0.9943           | 0.9569           | 0.9548           | 0.9265           |
|                                  | (0.8529, 0.8661) | (0.9895, 0.9914) | (0.9738, 0.9762) | (0.8853, 0.9962) | (0.9528, 0.9593) | (0.9231, 0.9405) | (0.9756, 0.9781) | (0.9700, 0.9725) | (0.8851, 0.9845) | (0.8795, 0.8936) | (0.6111, 0.6420) | (0.9932, 0.9945) | (0.9537, 0.9575) | (0.8682, 0.9666) | (0.9405, 0.9507) |

AUC, area under the curve; MCC, matthews correlation coefficient.
